# Supplementary material
Source: publisher figshare collection journal article supplement (https://tandf.figshare.com/ndownloader/files/25971163)
Supplement: Supplementary file 1 [file 25971163]

Species listed and 35 categories created by coding responses.

#### **Arctic Species**

At three points in time: 1) at the beginning of the study (i.e., before the treatment or control intervention), 2) immediately after the study, and 3) four weeks later, participants listed up to three species that lived in the Arctic. At post and follow-up, participants were specifically asked to list species they discovered while playing the game or reading the article. Based on the responses given by participants and the actual species included in the game/article, GRG created the 35 “species categories” listed in Table 7 to organize participants’ responses.

Table 7

35 Species Categories

| **Species Categories** | |
| --- | --- |
| Algae (ice, vague) | Manatee |
| Bear (vague) | Mussel |
| Bear (polar bear) | Penguin |
| Bird (vague) | Plankton (vague, zooplankton, phytoplankton) |
| Bird (duck, arctic duck) | Sea Lion |
| Bird (ivory gull) | Seal (vague) |
| Bird (other – puffin, owl, tern) | Seal (bearded) |
| Caribou/Reindeer | Seal (ringed) |
| Clam | Seal (other – fur, leopard, otary/eared) |
| Copepod (ice, vague) | Shrimp |
| Crab | Squid |
| Fish (arctic, vague) | Walrus |
| Fish (cod, arctic cod) | Whale (vague) |
| Fish (salmon) | Whale (beluga) |
| Fox (arctic, vague) | Whale (bowhead) |
| Human | Whale (narwhal) |
| Hare/Rabbit | Whale (orca) |
| Krill |  |
